# Supplementary material for: Single-click beam patterns suggest dynamic changes to the field of view of echolocating Atlantic spotted dolphins (Stenella frontalis) in the wild
Source: Oxford University Press journal article supplement (doi:10.1242/jeb.116285), 2015-01-01
Supplement: jeb116285supp.pdf [file jeb116285supp.pdf]

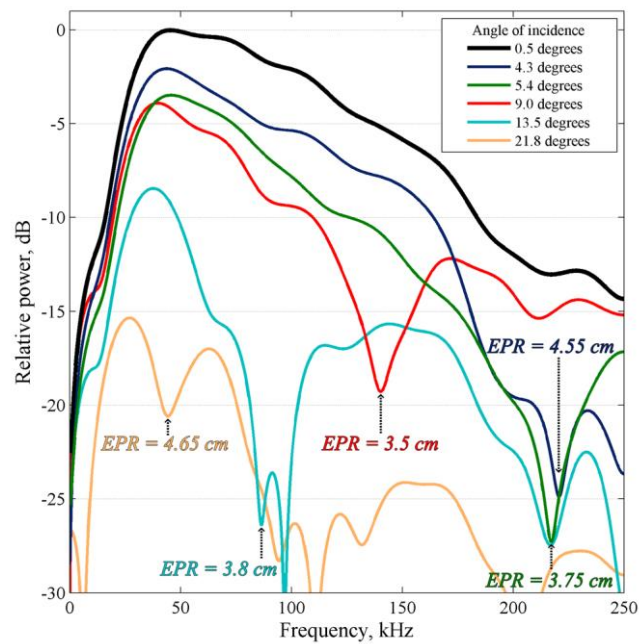

**Fig S1. Implementation of spectral notch estimation of equivalent piston radius (EPR).** Solid lines (colour-coded according to estimated angle of incidence) indicate the interpolated (100x) power spectrum derived at each receiver and offset from the on-axis power spectrum by the difference in estimated peak-to-peak source level. Arrows mark the first spectral notch for each channel (notches were estimated from non-interpolated power spectra), with estimated equivalent piston radius calculated from eq. 1. The total mean equivalent piston radius for this click was 4.05 cm.

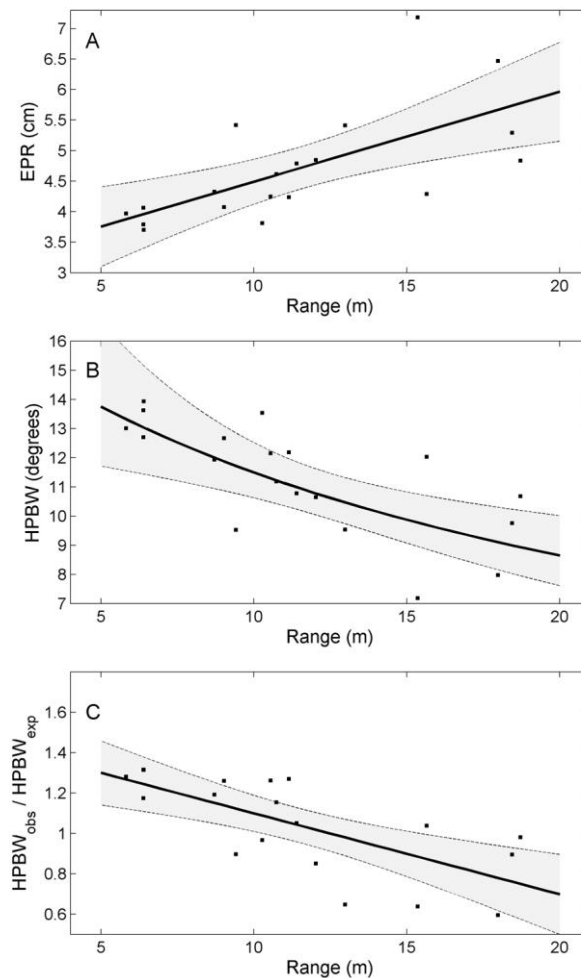

**Fig. S2. Dynamic changes in biosonar field of view for Atlantic spotted dolphins estimated using spectral notch approach.** A: Equivalent piston radius (EPR) (squares) estimated using the spectral notch method (Fig. S1) as a function of range. Black line represents a significant linear least squares regression ( $R^2=0.44$ ,  $F_{17}=13.2$ ,  $p=0.002$ ) and the grey shaded area represents the 95% confidence interval of the linear regression. B: The half-power beamwidth (HPBW) as a function of range. C: Observed HPBW divided by the HPBW that would be expected if beamwidth was determined by a constant EPR (the mean EPR estimated by spectral notch method) and a changing centroid frequency (measured for each click). Black line represents a significant linear least squares regression ( $R^2=0.49$ ,  $F_{17}=16.3$ ,  $p=0.0008$ ), and the grey, shaded area represents the 95% confidence interval of the linear regression.

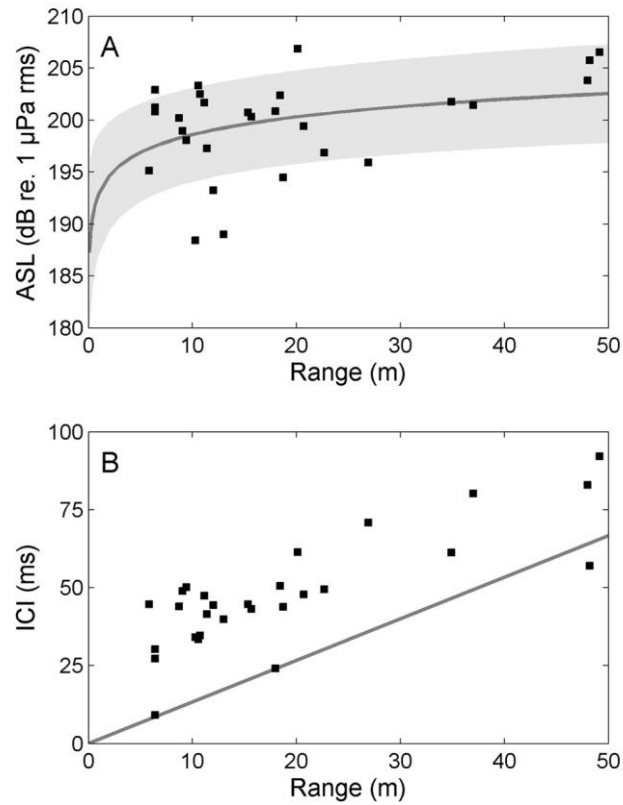

**Fig. S3. Adjustment of apparent source level and interclick interval with range for on-axis Atlantic spotted dolphin biosonar clicks.** A: Apparent source level as a function of range (squares), with a log-linear fit to range overlaid (grey line and confidence intervals). B: Interclick intervals as a function of range (squares). Grey line shows the two-way travel time between the dolphin and the array.
